# Supplementary material
Source: Springer Nature journal article supplement (https://www.springermedizin.de/resource/supplementary/12865_2005_81_MOESM8_ESM.pdf/9428468)

## Correlation of qPCR and Flow Results in Spleen

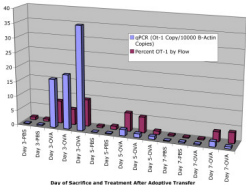

Supplement: MOESM8 [file 9428468]
